# Supplementary material for: Anion induced supramolecular polymerization: a novel approach for the ultrasensitive detection and separation of F−
Source: Royal Society of Chemistry journal article supplement (doi:10.1039/c8cc09876j), 2019-01-01
Supplement: c8cc09876j1.pdf [file c8cc09876j1.pdf]

## ***Supporting Information***

### **Anion induced supramolecular polymerization: a novel approach for ultrasensitive detection and separation of F<sup>-</sup>**

Qi Lin\*<sup>[a]</sup>, Guan-Fei Gong<sup>[a]</sup>, Yan-Qing Fan<sup>[a]</sup>, Yan-Yan Chen<sup>[a]</sup>, Jiao Wang<sup>[a]</sup>, Xiao-Wen Guan<sup>[a]</sup>, Juan  
Liu\*<sup>[b]</sup>, You-Ming Zhang<sup>[a]</sup>, Hong Yao<sup>[a]</sup>, Tai-Bao Wei\*<sup>[a]</sup>

*a. Key Laboratory of Eco-Environment-Related Polymer Materials, Ministry of Education of China, Key Laboratory of Polymer Materials of Gansu Province, College of Chemistry and Chemical Engineering, Northwest Normal University, Lanzhou, Gansu, 730070, P. R. China. E-mail: linqi2004@126.com; weitaibao@126.com.*

*b. A College of Chemical Engineering, Northwest University for Nationalities, Lanzhou, 730070, China. E-mail: liujuan656@126.com.*

# Contents

## Materials and method

### General procedure:

1. F<sup>-</sup> test kit preparation
2. TNA or TNA-F film preparation
3. Adsorption experiment
4. Calculation method of adsorption percentage
5. Calculation formula of LOD
6. Calculation formula of stability constants ( $K_s$ )
7. NMR experiments
8. Fluorescence spectra experiments
9. Study of FT-IR spectroscopy
10. Study of scanning electron microscopy (SEM)

**Scheme S1:** Synthesis of **TNA**.

### Synthesis of P1

**Fig. S1:** <sup>1</sup>H NMR Spectrum of P1 in DMSO-*d*<sub>6</sub> (400 MHz, 298K)

**Fig. S2:** <sup>13</sup>C NMR Spectrum of P1 in DMSO-*d*<sub>6</sub> (100 MHz, 298K).

**Fig. S3:** ESI-MS of P1.

**Fig. S4:** FT-IR spectra of P1 in KBr disk.

### Synthesis of TNA

**Fig. S5:** <sup>1</sup>H NMR Spectrum of **TNA** in DMSO-*d*<sub>6</sub> (600 MHz, 298K).

**Fig. S6:** <sup>13</sup>C NMR Spectrum of **TNA** in DMSO-*d*<sub>6</sub> (150 MHz, 298K).

**Fig. S7:** HR-ESI-MS of **TNA**.

**Fig. S8:** FT-IR spectra of **TNA** in KBr disk.

**Fig. S9:** Fluorescence spectra of **TNA** ( $1 \times 10^{-4}$  M) in the presence of different concentrations of F<sup>-</sup> in DMSO/H<sub>2</sub>O (7.4 : 2.6, v/v) solution.

**Fig. S10a:** Fluorescent spectrum linear range for F<sup>-</sup> by addition of various concentrations of F<sup>-</sup> to **TNA** ( $1 \times 10^{-4}$  M).

**Fig. S10b:** A plot of emission of **TNA** at 430 nm versus number of equivalents of F<sup>-</sup>.

**Table S1:** The detection limits of reported F<sup>-</sup> sensors based on various detection mechanism.

**Fig. S11:** 2D NOESY NMR spectrum of the **TNA-F** supramolecular polymer fiber in DMSO-*d*<sub>6</sub> solution.

**Fig. S12:** The <sup>19</sup>F NMR spectrum of the **TNA-F** supramolecular polymer fiber in DMSO-*d*<sub>6</sub> (376 MHz, 298K).

**Fig. S13:** Partial <sup>1</sup>H NMR spectra (400 MHz, 298 K) of **TNA** in DMSO-*d*<sub>6</sub> at various concentrations: (a) 7.57 mM, (b) 12.6 mM, (c) 17.7 mM, (d) 27.8 mM.

**Fig. S14:** XRD pattern of the **TNA-F**.

**Fig. S15:** (a) The proposed response mechanism of **TNA** for  $F^-$  and **TNA-F** for  $Fe^{3+}$ ; (b) FT-IR spectra of **TNA**, **TNA-F** and **TNA-F** +  $Fe^{3+}$  in KBr disk.

**Fig. S16a:** The positive ion pattern of HRMS for the **TNA-F** supramolecular polymer and simulate isotopic pattern of  $[TNA+F+K+H]^+$ .

**Fig. S16b:** The negative ion pattern of HRMS for the **TNA-F** supramolecular polymer and simulate isotopic pattern of  $[TNA+F+CH_3COOH]^-$ .

**Fig. S17:** SEM image of i): **TNA**; ii): **TNA-F**; iii): **TNA-F** +  $Fe^{3+}$ .

**Fig. S18:** The TEM images of the supramolecular polymer **TNA-F**.

**Fig. S19:** TGA curves of **TNA-F** recorded under nitrogen a heating rate of  $10\text{ }^\circ\text{C min}^{-1}$ .

**Fig. S20:** The photograph of the IC linear range.

**Fig. S21:** Ion chromatogram of fluoride using an eluent containing  $Na_2CO_3$  (4.5 mM) +  $NaHCO_3$  (1.4 mM), a flow rate of  $1.20\text{ mL min}^{-1}$ , injection volume of  $25\text{ }\mu\text{L}$  and suppress current of 31 mA. The peaks highlighted are due to  $1-F^-$ . The detail data shown in **Table S2**.

**Table.S2:** The detailed data of **Fig. S21**.

**Fig. S22:** Fluorescence emission spectra for **TNA-F** ( $1 \times 10^{-4}\text{ M}$ ) in DMSO/ $H_2O$  (7.4 : 2.6, v/v) solution upon the addition of 10.0 equiv. of  $Ca^{2+}$ ,  $Mg^{2+}$ ,  $Pb^{2+}$ ,  $Ni^{2+}$ ,  $Co^{2+}$ ,  $Hg^{2+}$ ,  $Zn^{2+}$ ,  $Cd^{2+}$ ,  $Fe^{3+}$ ,  $Ag^+$ ,  $Cu^{2+}$ ,  $Cr^{3+}$ ,  $Al^{3+}$ ,  $Tb^{3+}$ ,  $Ba^{2+}$ ,  $La^{3+}$  and  $Eu^{3+}$ , respectively, ( $\lambda_{ex} = 380\text{ nm}$ ,  $\lambda_{em} = 430\text{ nm}$ ).

**Fig. S23:** Colour changes observed for **TNA-F** in DMSO/ $H_2O$  (7.4 : 2.6, v/v) solution upon the addition of 10.0 equiv. of  $Ca^{2+}$ ,  $Mg^{2+}$ ,  $Pb^{2+}$ ,  $Ni^{2+}$ ,  $Co^{2+}$ ,  $Hg^{2+}$ ,  $Zn^{2+}$ ,  $Cd^{2+}$ ,  $Fe^{3+}$ ,  $Ag^+$ ,  $Cu^{2+}$ ,  $Cr^{3+}$ ,  $Al^{3+}$ ,  $Tb^{3+}$ ,  $Ba^{2+}$ ,  $La^{3+}$  and  $Eu^{3+}$ , respectively, under irradiation at 365 nm by a UV lamp.

**Fig. S24:** Fluorescence spectra of **TNA-F** ( $1 \times 10^{-4}\text{ M}$ ) in the presence of different concentrations of  $Fe^{3+}$  in DMSO/ $H_2O$  (7.4 : 2.6, v/v) solution ( $\lambda_{ex} = 380\text{ nm}$ ,  $\lambda_{em} = 430\text{ nm}$ ).

**Fig. S25:** Fluorescent spectrum linear range for  $Fe^{3+}$  by addition of various concentrations of  $Fe^{3+}$  to **TNA-F** ( $1 \times 10^{-4}\text{ M}$ ).

**Table S3:** Stability constant of iron and fluorine complexes in different proportions.

**Fig. S26:** Fluorescence of the sensor **TNA-F** at 380 nm with addition of 10.0 equiv. of  $Fe^{3+}$  in the presence of 10.0 equiv. of other cations in DMSO/ $H_2O$  (7.4 : 2.6, v/v) solution. (4.  $Ca^{2+}$ , 5.  $Mg^{2+}$ , 6.  $Pb^{2+}$ , 7.  $Ni^{2+}$ , 8.  $Co^{2+}$ , 9.  $Hg^{2+}$ , 10.  $Zn^{2+}$ , 11.  $Cd^{2+}$ , 12.  $Ag^+$ , 13.  $Cu^{2+}$ , 14.  $Cr^{3+}$ , 15.  $Al^{3+}$ , 16.  $Tb^{3+}$ , 17.  $Ba^{2+}$ , 18.  $La^{3+}$ , 19.  $Eu^{3+}$ ).

**Fig. S27:** (a) A Job's plot for the **TNA** and  $F^-$ , indicating the 1 : 1 stoichiometry for **TNA-F**. (b) Fluorescent "on-off-on" cycles of **TNA-F**, controlled by the alternate addition of  $Fe^{3+}$  and  $F^-$ .

**Fig. S28:** (a) Photos of the silica gel plates loaded with **TNA** or **TNA-F** were utilized to sense  $F^-$  and  $Fe^{3+}$  in aqueous solutions under UV lamp at 365 nm; (b) Fluorescence colour changes (under the UV lamp, at  $\lambda_{ex} = 365\text{ nm}$ ) of **TNA**-based test kit after addition of different concentration  $F^-$  aqueous solutions (from 0 M to  $1 \times 10^{-9}\text{ M}$ ).

## Materials and instruments

All cations were used as the perchlorate salts, while all anions were used as the Tetrabutyl ammonium salts, which were purchased from Alfa Aesar and used as received. Fresh double distilled water was used throughout the experiment. Nuclear magnetic resonance (NMR) spectra were recorded on Varian Mercury 400 and Varian Inova 600 instruments. Mass spectra were recorded on a Bruker Esquire 6000 MS instrument. The infrared spectra were performed on a Digilab FTS-3000 Fourier transform-infrared spectrophotometer. Melting points were measured on an X-4 digital melting-point apparatus (uncorrected). The morphologies and sizes of the supramolecular polymer was characterized using field emission scanning electron microscopy (FE-SEM, UL TRA plus). The fluorescent information of the supramolecular polymer was characterized using Laser Scanning Confocal Microscope (LSCM, Olympus Fluoview FV1200). The X-ray diffraction analysis (XRD) was performed in a transmission mode with a Rigaku RINT2000 diffractometer equipped with graphite monochromated CuK $\alpha$  radiation ( $\lambda = 1.54073 \text{ \AA}$ ). The thermal stability of the supermolecular polymer was characterized using Thermal Gravimetric Analyzer (TGA/DSC1). Fluorescence spectra were recorded on a Shimadzu RF-5301PC spectrofluorophotometer. Ion chromatography (IC) was recorded on Dionex ICS-1500.

## General procedure:

### 1 F<sup>-</sup> test kit preparation

The silica gel plate was been immersed in F<sup>-</sup> solution of different concentration, then it was aired at room temperature, obtaining the **TNA** or **TNA-F** film.

### 2 TNA or TNA-F film preparation

The **TNA**, **TNA-F** was heated to dissolve, then, it was dumped on the silica gel plate and aired at room temperature, obtaining the **TNA** or **TNA-F** film.

### 3 Adsorption experiment:

Solid powder of **TNA** (10.0 mg,  $1.26 \times 10^{-5}$  mol) was suspended in a dilute aqueous solution of F<sup>-</sup> (the concentration is about 2.61 mg/L in 10.0 mL) and stirred for 0.5 h. Then, the suspension was centrifuged at 10000 rpm for 5 min the precipitate was removed. Finally, the ingestion capacity of the **TNA** for F<sup>-</sup> in water was assessed by ion chromatography (IC) analysis.

### 4 Calculate method of adsorption percentage:

$$\text{Adsorption percentage (\%)} = \left(1 - \frac{C_1 \times V_1}{C_0 \times V_0}\right) \times 100\%$$

(State:  $C_1$  is the residual concentration of F<sup>-</sup>,  $C_0$  is the initial concentration of F<sup>-</sup>,  $V_1 = V_0$ ).

### 5 Calculation formula of LOD:

Linear Equation:  $Y = aX + b$

$$\delta = \sqrt{\frac{\sum (x_i - \bar{x})^2}{n-1}} \quad (n=20)$$

$$\text{LOD} = K \times \frac{\delta}{\bar{S}} \quad (K = 3, S = a \times 10^6)$$

## 6 Calculation formula of association constants ( $K_s$ )

$$\ln \frac{I_x - I_{\min}}{I_{\max} - I_x} = \ln K_s + n \ln [F^-]$$

$$K_s = 5.46 \times 10^9$$

The stability constant ( $K_s$ ) was determined by a nonlinear least squares fit of the data with the following equation as referenced elsewhere.  $I$  is the observed the fluorescence intensity of **TNA** at the fixed concentrations with the gradual addition of  $F^-$ .  $I_{\max}$  and  $I_{\min}$  are the corresponding maximum and minimum, respectively.

## 7 NMR experiments

(1) The host (**TNA**)-guest ( $F^-$ )  $^1\text{H}$  NMR titration:

The **TNA** (5 mg,  $1 \times 10^{-2}$  mol) was dissolved in the  $\text{DMSO}-d_6$  (0.5 ml), then a series of different equivalents of  $F^-$  (0.2 equiv., 0.5 equiv., 1.0 equiv.) were added into the solution of **TNA** and recorded their  $^1\text{H}$  NMR respectively.

(2) The concentrations-dependent  $^1\text{H}$  NMR of **TNA**:

A series of  $\text{DMSO}-d_6$  (0.5 ml) solutions of **TNA** with different concentrations (7.57 mM; 12.6 mM; 17.7 mM; 27.8 mM) was prepared. Then record their  $^1\text{H}$  NMR respectively.

(3) The host (**TNA**)-guest ( $F^-$ )  $^{19}\text{F}$  NMR titration:

The tetrabutylammonium fluoride ( $3.8 \times 10^{-5}$  M) was dissolved in the  $\text{DMSO}-d_6$  (0.5 ml), then a series of different equivalents of **TNA** (0.1 equiv., 0.5 equiv., 1.0 equiv.) were added into the solution of tetrabutylammonium fluoride and recorded their  $^{19}\text{F}$  NMR, respectively.

## 8 Fluorescence spectra experiments

All the fluorescence spectroscopy was carried out in  $\text{DMSO}/\text{H}_2\text{O}$  (7.4 : 2.6, v/v) solution on a Shimadzu RF-5301 spectrometer. With different equivalents tetrabutylammonium salt of anions ( $F^-$ ,  $\text{CN}^-$ ,  $\text{I}^-$ ,  $\text{Cl}^-$ ,  $\text{N}_3^-$ ,  $\text{ClO}_4^-$ ,  $\text{H}_2\text{PO}_4^-$ ,  $\text{AcO}^-$ ,  $\text{HSO}_4^-$ ,  $\text{SCN}^-$ ,  $\text{Br}^-$ ) were added into **TNA** while keeping the host concentration constant ( $1.0 \times 10^{-4}$  M) in all the experiments. The detection limits for guest ions were determined by fluorescent titrations and calculated on the basis of  $3\sigma/s$  method.

## 9 Study of FT-IR spectroscopy

FT-IR spectra were recorded on a Digilab FTS-3000 Fourier transform-infrared spectrophotometer. The solid powder of **TNA**, **TNA-F** and **TNA-F** +  $\text{Fe}^{3+}$  was prepared by drying a resulting gel on a glass slice for a long time. All the samples were mixed well-distributedly with KBr to create a compact pellet for the FT-IR detection.

## 10 Study of scanning electron microscopy (SEM)

Determination of the SEM images was performed on a JSM-6701F FE-SEM microscope. A SEM sample was fabricated by spreading the solid powder on conductive plastic. Then gold powder was sprayed on the sample after the detection system was vacuumized. The SEM image of the solid powder was determined with an accelerating voltage of 8 kV.

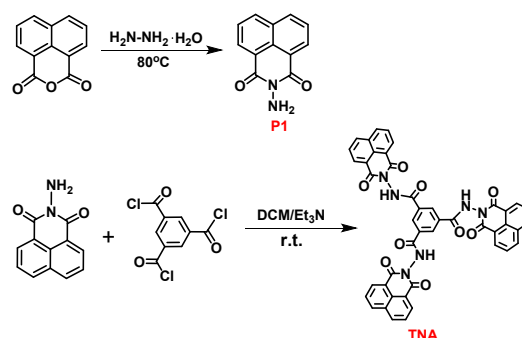

**Scheme S1:** Synthesis of TNA.

### Synthesis of P1

The P1 was synthesized according to literature method<sup>S1</sup>. A mixture of Hydrazine hydrate (0.3182 g, 6 mmol, 80%), 1, 8-naphthalic anhydride (0.9901 g, 5 mmol) and alcohol (160.0 mL) were added to a 250 mL round-bottom flask under. The reaction mixture was stirred at 80 °C for 16 h. The solvent was removed and the residue was recrystallized in DMF and water to give the yellow needle-like solid (P1), (0.9434 g, 89%). M.P.: 265 °C. <sup>1</sup>H NMR (400 MHz, DMSO-*d*<sub>6</sub>, room temperature) δ (ppm): 8.47 (m, 4H), 7.86 (t, *J* = 8.0 Hz, 2H), 5.78 (s, 2H). <sup>13</sup>C NMR (DMSO-*d*<sub>6</sub>, 100 MHz): 160.48, 134.52, 130.80, 127.25, 126.00, 121.6. ESI-MS *m/z*: [P1+H]<sup>+</sup> Calcd C<sub>12</sub>H<sub>8</sub>N<sub>2</sub>O<sub>2</sub> 213.07, found 213.00. FT-IR (anhydrous KBr, cm<sup>-1</sup>) *v*: 3323, 3234 (NH<sub>2</sub>), 1670 (C=O).

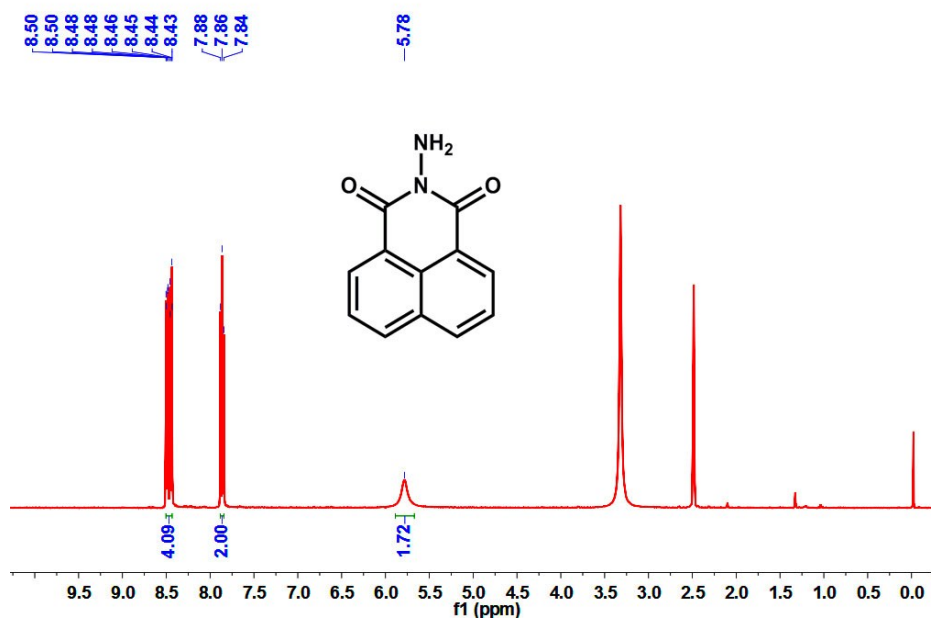

**Fig.S1:** <sup>1</sup>H NMR Spectrum of P1 in DMSO-*d*<sub>6</sub> (400 MHz, 298K).

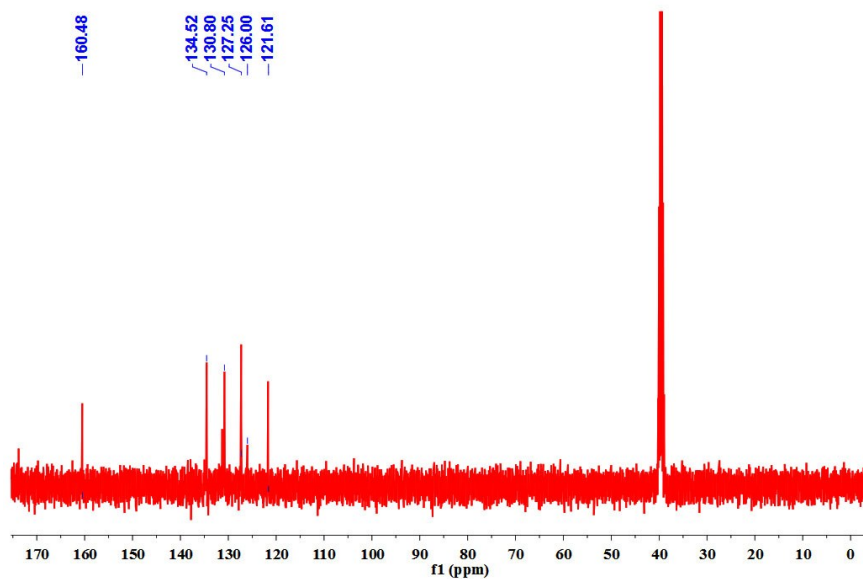

Fig.S2:  $^{13}\text{C}$  NMR Spectrum of P1 in  $\text{DMSO-}d_6$  (100 MHz, 298K).

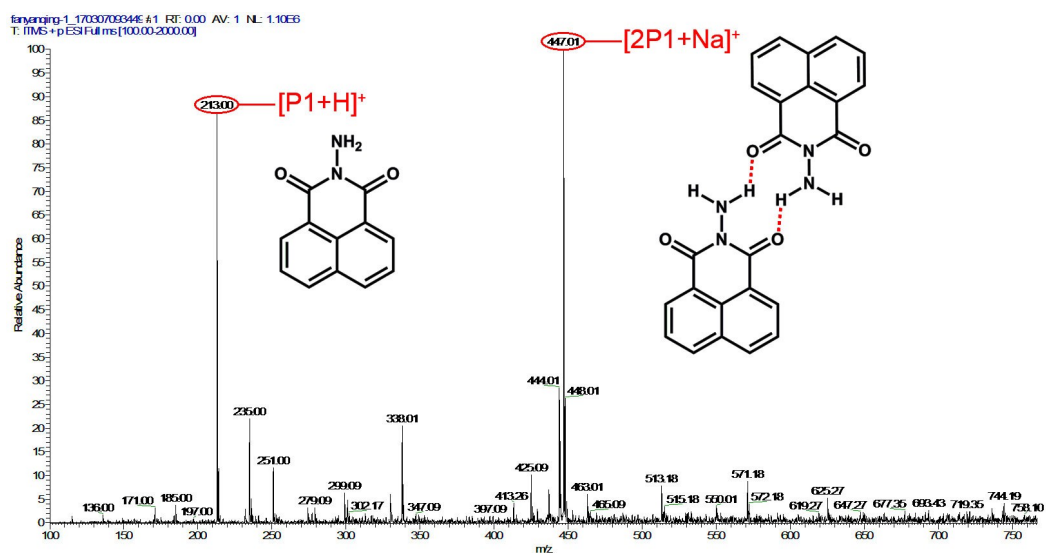

Fig.S3: ESI-MS of P1.

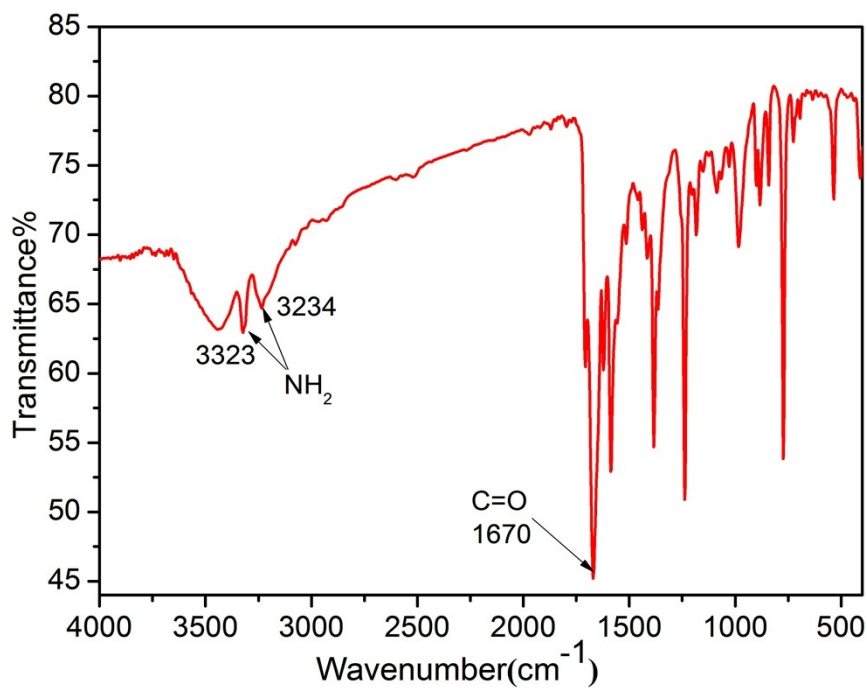

**Fig.S4:** FT-IR spectrum of P1 in KBr disk.

#### Synthesis of TNA:

A solution of 1, 3, 5-benzenetricarbonyl trichloride (1 mmol, 0.2657 g) was dropwise added into the mixture of P1 (4 mmol, 0.8482 g) and TEA (1 mL) in  $\text{CH}_2\text{Cl}_2$ . The mixture was stirred at room temperature for 15 h. The solvent was removed and the residue was recrystallized in DMF and alcohol, washed by alcohol and water. The product **TNA** was collected by filtration, and dried under vacuum (0.6256 g, 79%). M.P.: > 280 °C.  $^1\text{H}$  NMR (600 MHz,  $\text{DMSO}-d_6$ , room temperature)  $\delta$  (ppm): 11.81 (s, 3H), 8.84 (s, 3H), 8.58 (m, 12H), 7.94 (t,  $J = 6.0$  Hz, 6H).  $^{13}\text{C}$  NMR ( $\text{DMSO}-d_6$ , 150 MHz): 164.53, 162.13, 135.89, 131.95, 127.66, 121.94. HR-ESI-MS  $m/z$ : [**TNA**+Na] $^+$  Calcd  $\text{C}_{45}\text{H}_{24}\text{N}_6\text{O}_9\text{Na}$  815.1497, found 815.14972.

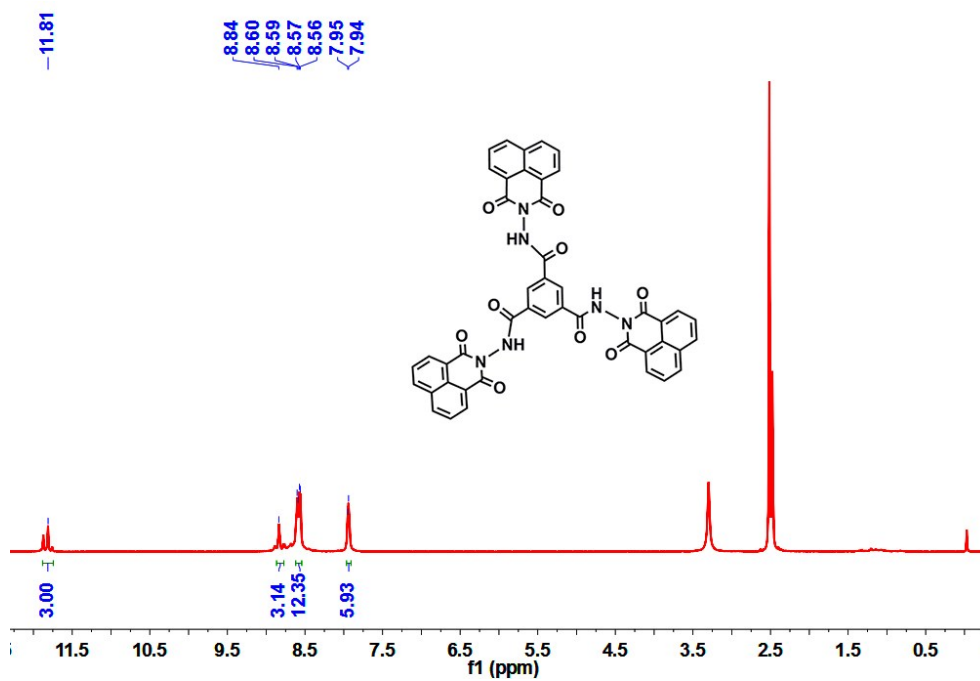

Fig. S5: <sup>1</sup>H NMR Spectrum of **TNA** in DMSO-*d*<sub>6</sub> (600 MHz, 298K).

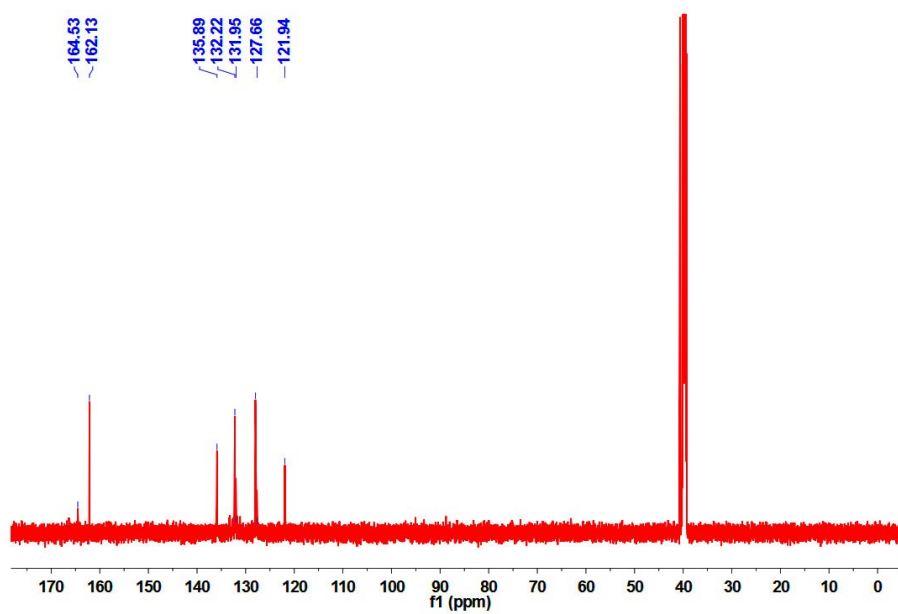

Fig. S6: <sup>13</sup>C NMR Spectrum of **TNA** in DMSO-*d*<sub>6</sub> (150 MHz, 298K).

## User Spectra

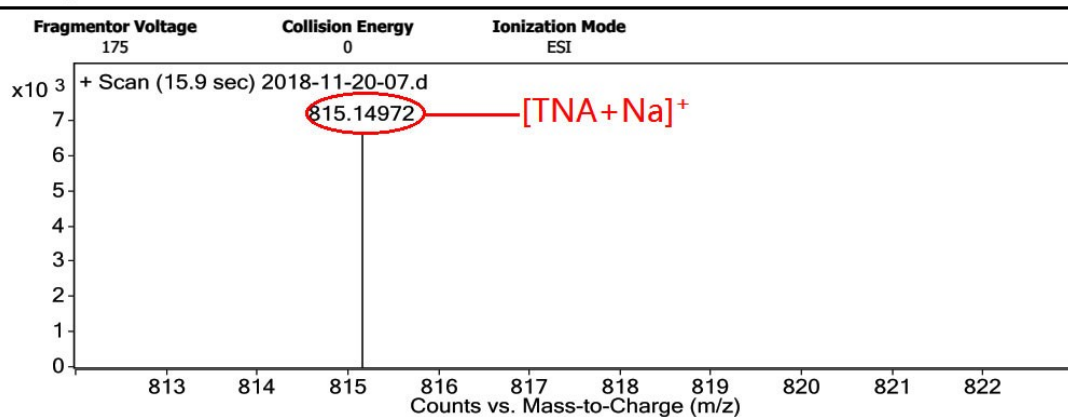

Fig. S7: HR-ESI-MS of TNA.

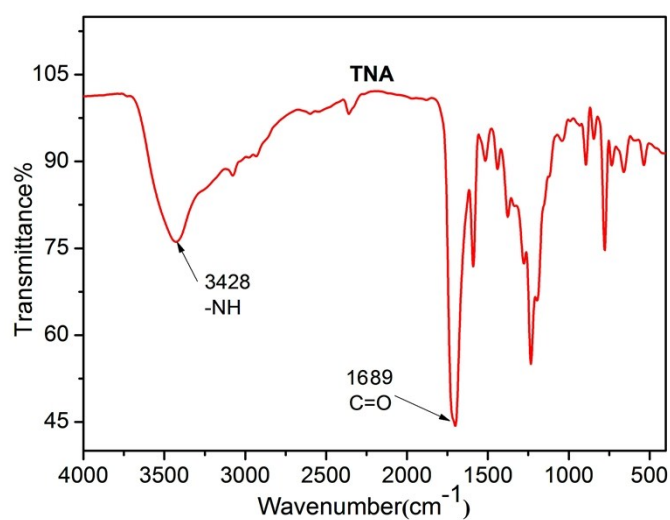

Fig.S8: FT-IR spectrum of TNA in KBr disk.

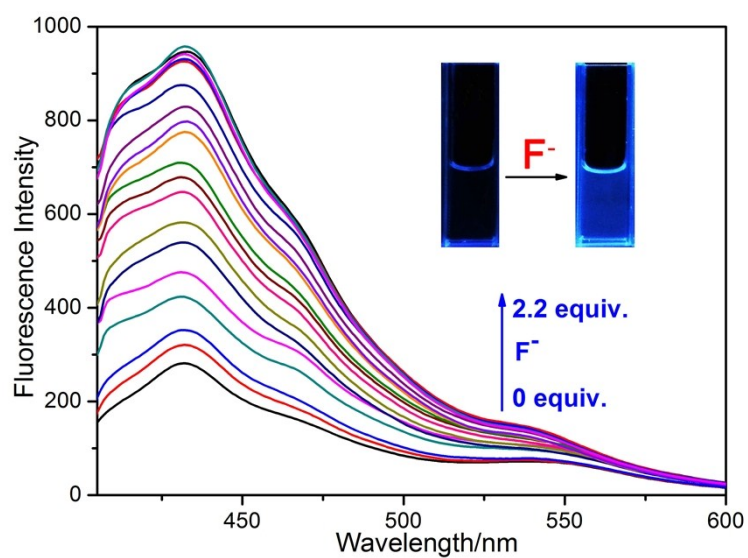

Fig. S9: Fluorescence spectra of TNA ( $1 \times 10^{-4}$  M) in the presence of different concentrations of  $F^-$  in DMSO/ $H_2O$  (7.4 : 2.6, v/v) solution.

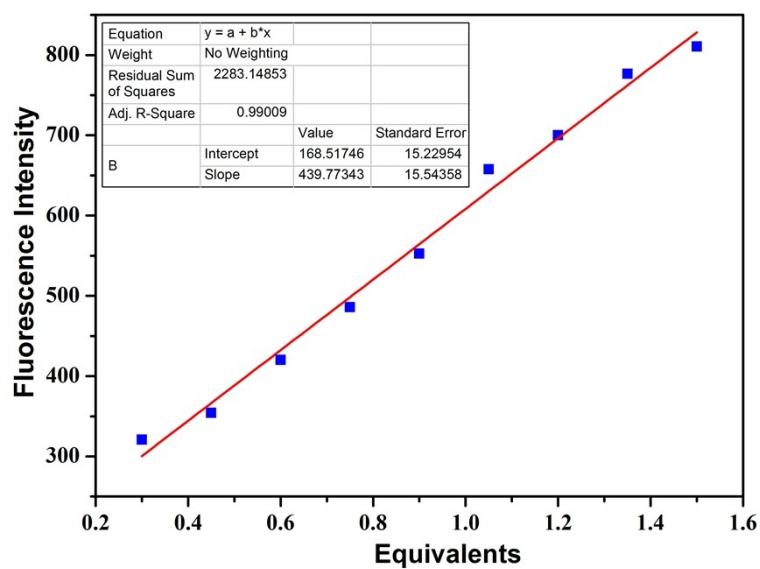

**Fig. S10a:** Fluorescent spectrum linear range for  $F^-$  by addition of various concentrations of  $F^-$  to **TNA** ( $1 \times 10^{-4}$  M).

$$\text{Linear Equation: } Y = 439.77343X + 168.51746 \quad R^2 = 0.99009$$

$$S = 439.77343 \times 10^6$$

$$\delta = \sqrt{\frac{\sum (x_i - \bar{x})^2}{n - 1}} = 1.27 \quad (n = 20)$$

$$K = 3$$

$$\text{LOD} = K \times \frac{\delta}{S} = 8.67 \times 10^{-9} \text{ M}$$

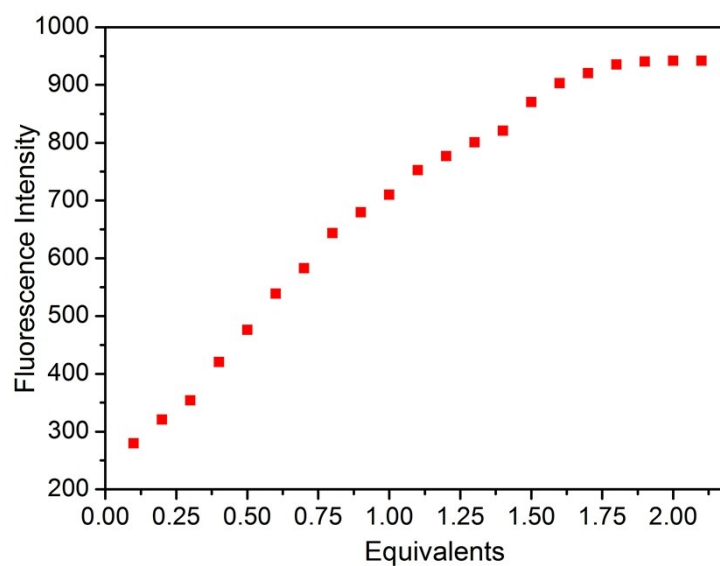

**Fig. S10b:** A plot of emission of **TNA** at 430 nm versus number of equivalents of  $F^-$ .

**Table S1:** The detection limits of reported F<sup>-</sup> sensors based on various detection mechanism.

| Ref.             | Detection mechanism                                                 | Solvent                              | LOD(M)                                 |
|------------------|---------------------------------------------------------------------|--------------------------------------|----------------------------------------|
| [8a]             | F <sup>-</sup> induced the QD-conjugate                             | CHCl <sub>3</sub>                    | $7.4 \times 10^{-7}$                   |
| [8b]             | F <sup>-</sup> induced the DL-PQD aggregation                       | Toluene                              | $3.2 \times 10^{-6}$                   |
| [9]              | F <sup>-</sup> induced the oxidase activity enhancement             | Acetate buffer                       | $6.4 \times 10^{-7}$                   |
| [10]             | F <sup>-</sup> ...H-N Hydrogen bond                                 | Aqueous solution                     | $9.7 \times 10^{-7}$                   |
| [11a]            | F <sup>-</sup> driven silyl deprotection                            | Acetonitrile                         | $5.0 \times 10^{-8}$                   |
| [11b]            | F <sup>-</sup> reacted with boric acid group                        | DMF/H <sub>2</sub> O (7:3)           | $2.0 \times 10^{-6}$                   |
| [11c]            | F <sup>-</sup> reacted with triisopropylsilyl                       | DMSO                                 | $1.2 \times 10^{-7}$                   |
| [12]             | F <sup>-</sup> coordination and F <sup>-</sup> ...H-C Hydrogen bond | Aqueous solution                     | $2.0 \times 10^{-5}$                   |
| <b>This work</b> | <b>F<sup>-</sup> induced supramolecular polymerization</b>          | <b>DMSO/H<sub>2</sub>O (7.4:2.6)</b> | <b><math>8.7 \times 10^{-9}</math></b> |

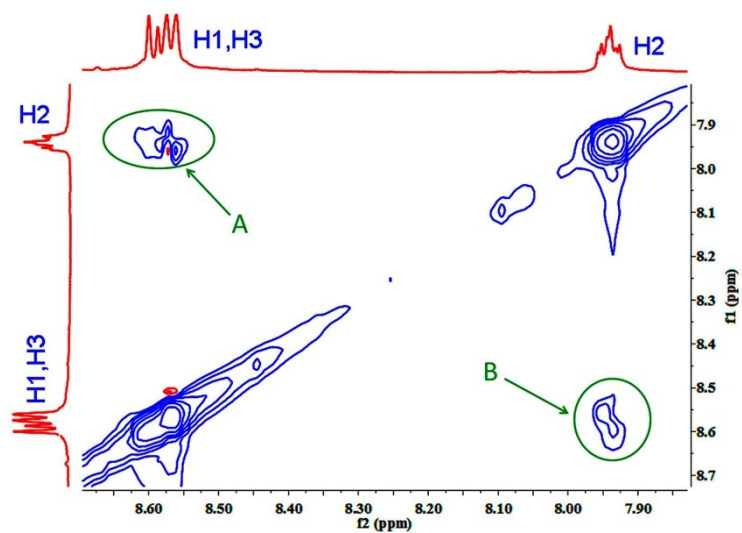

**Fig. S11:** 2D NOESY NMR spectrum of the supramolecular polymer fiber **TNA-F** in DMSO-*d*<sub>6</sub> solution.

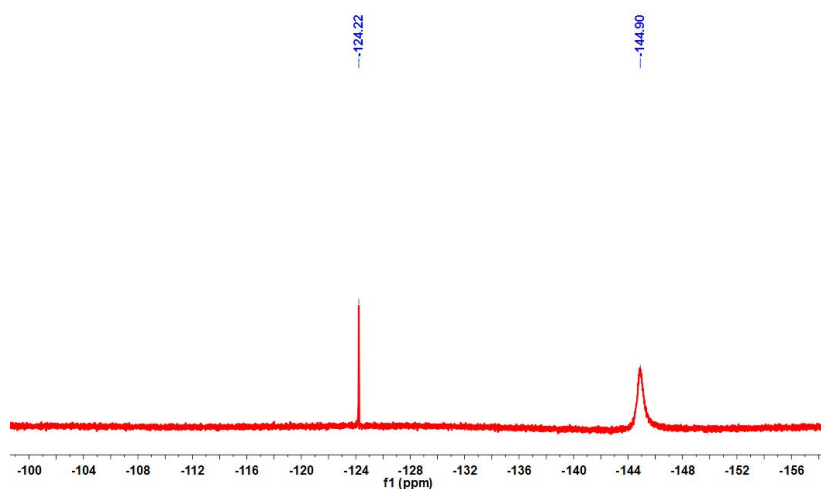

**Fig. S12:** The <sup>19</sup>F NMR spectrum of the supramolecular polymer fiber **TNA-F** in DMSO-*d*<sub>6</sub> (376 MHz, 298K).

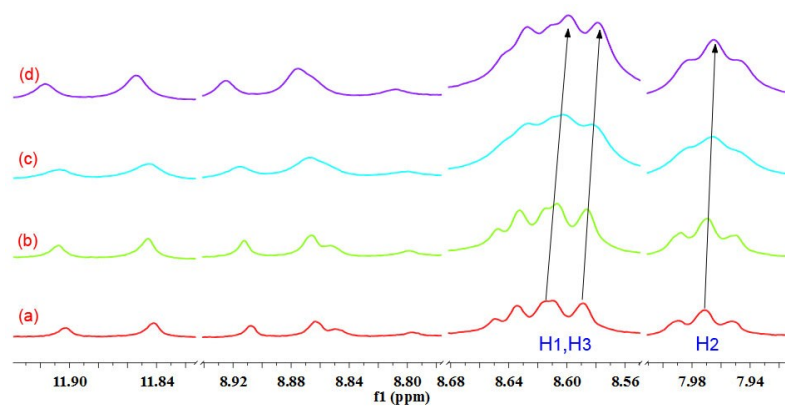

**Fig. S13:** Partial  $^1\text{H}$  NMR spectra (400 MHz, 298 K) of TNA in  $\text{DMSO-}d_6$  at various concentrations: (a) 7.57 mM, (b) 12.6 mM, (c) 17.7 mM, (d) 27.8 mM.

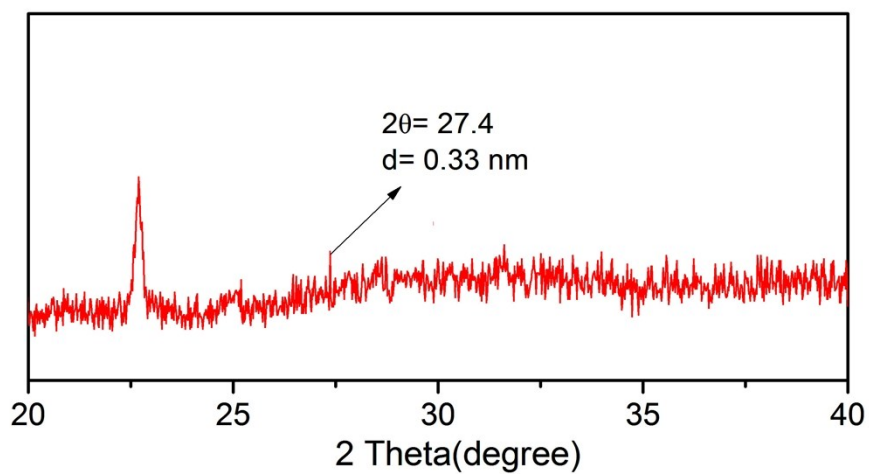

**Fig. S14:** XRD pattern of the TNA-F.

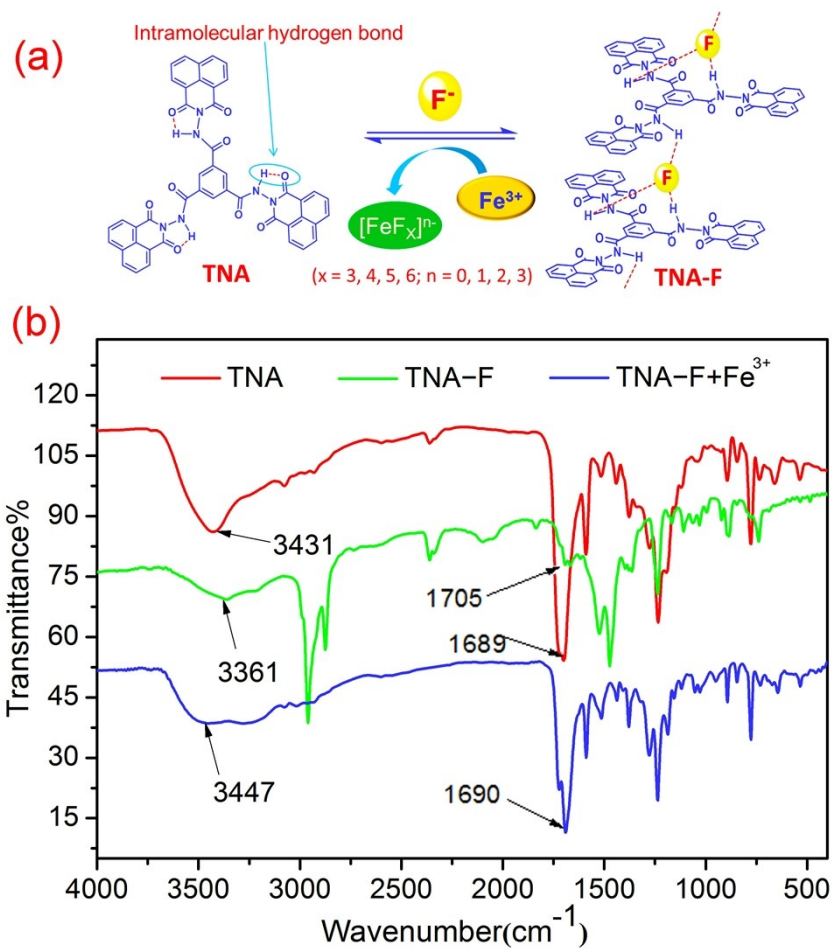

**Fig. S15:** (a) The proposed response mechanism of **TNA** for  $\text{F}^-$  and **TNA-F** for  $\text{Fe}^{3+}$ ; (b) FT-IR spectra of **TNA**, **TNA-F** and **TNA-F** +  $\text{Fe}^{3+}$  in KBr disk.

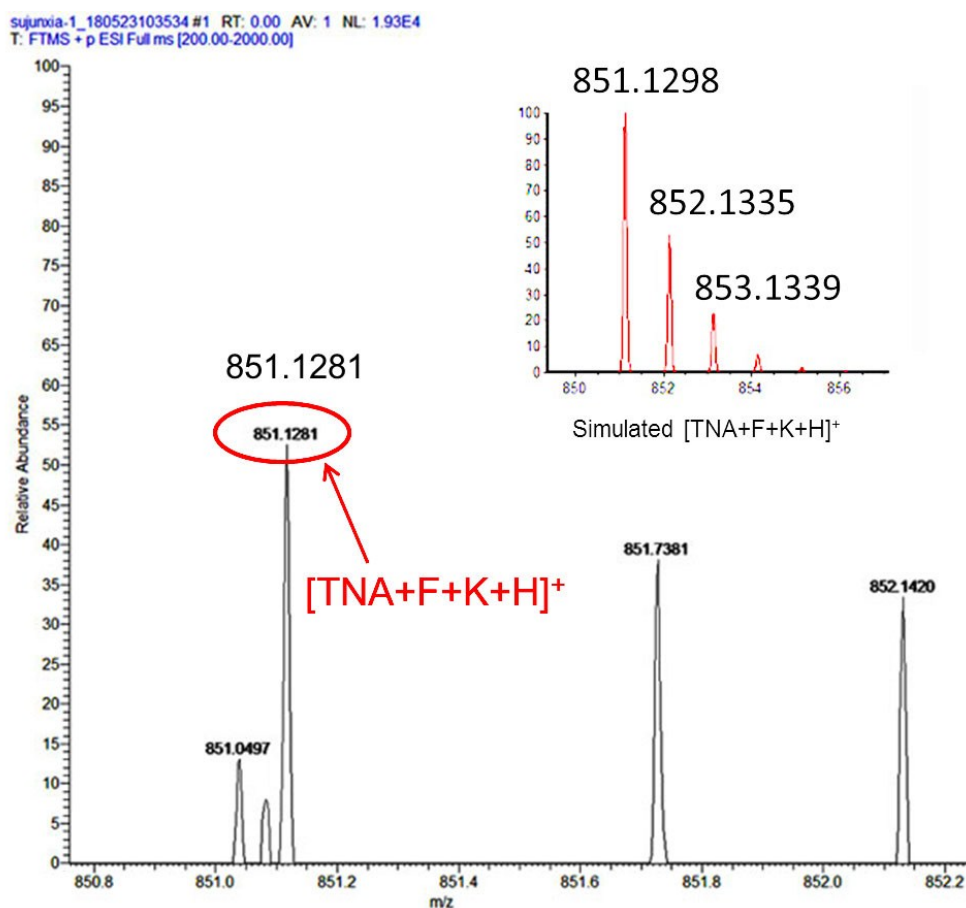

Fig. S16a: The positive ion pattern of HRMS for the **TNA-F** supramolecular polymer and simulate isotopic pattern of  $[TNA+F+K+H]^+$ .

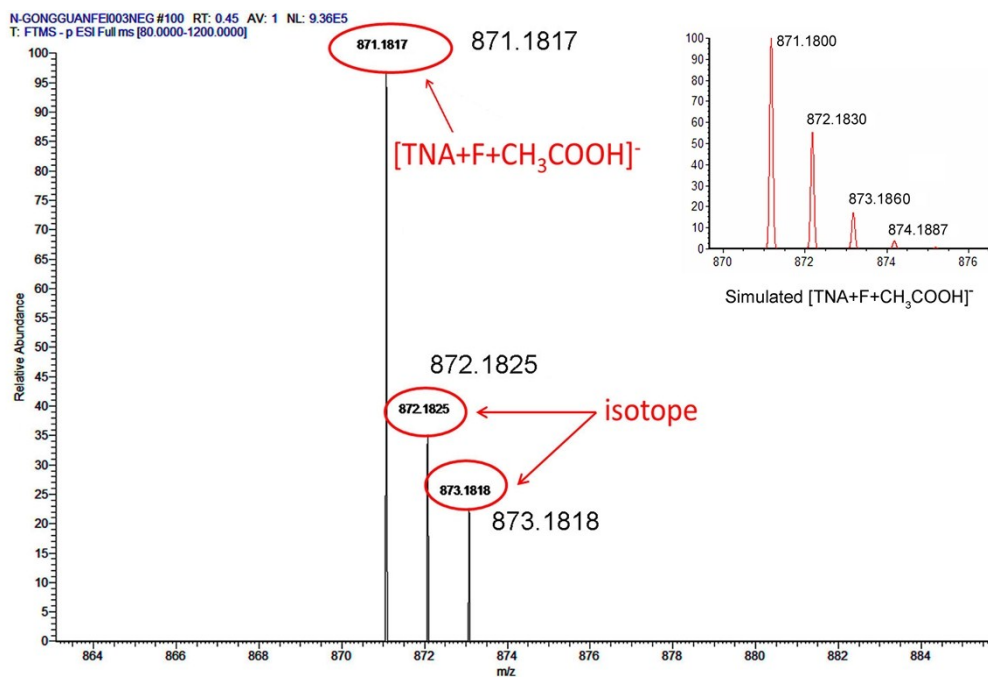

Fig. S16b: The negative ion pattern of HRMS for the **TNA-F** supramolecular polymer and simulate isotopic pattern of  $[TNA+F+CH_3COOH]^-$ .

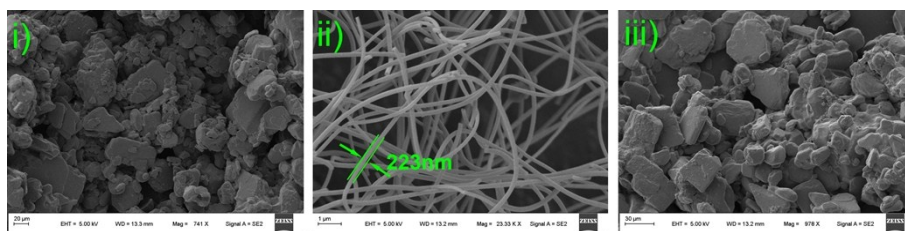

**Fig. S17:** SEM image of i): **TNA**; ii): **TNA-F**; iii): **TNA-F + Fe<sup>3+</sup>**.

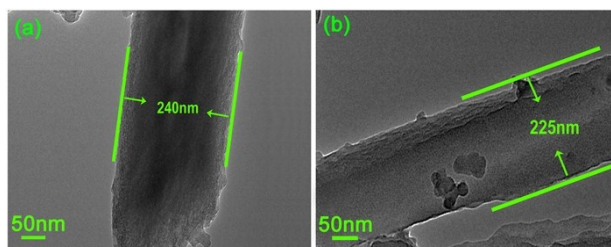

**Fig. S18:** The TEM images of the **TNA-F** supramolecular polymer.

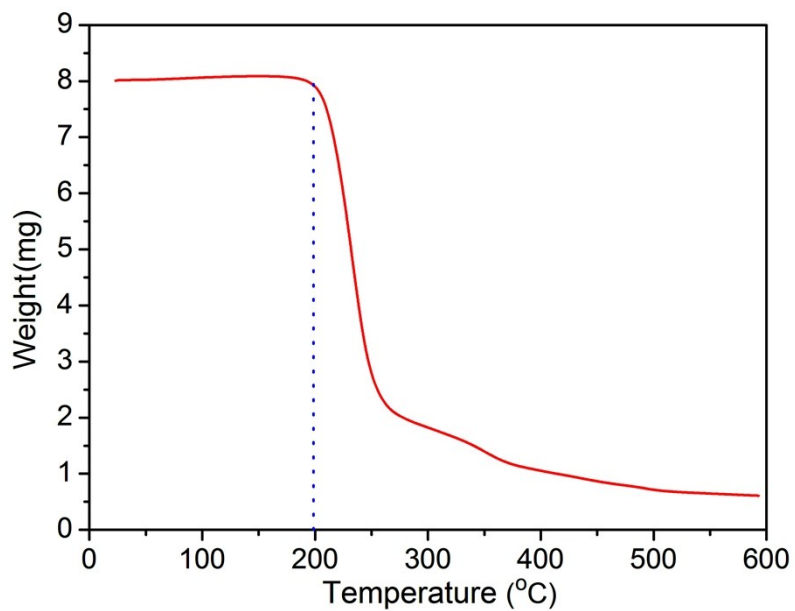

**Fig. S19:** TGA curves of **TNA-F** recorded under nitrogen a heating rate of 10 °C min<sup>-1</sup>.

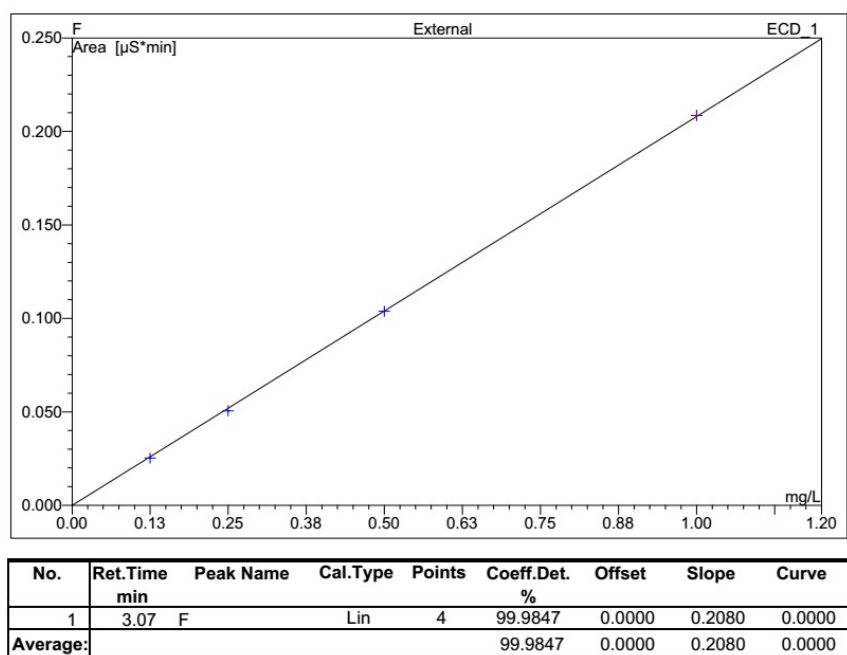

Fig. S20: The photograph of the IC linear range.

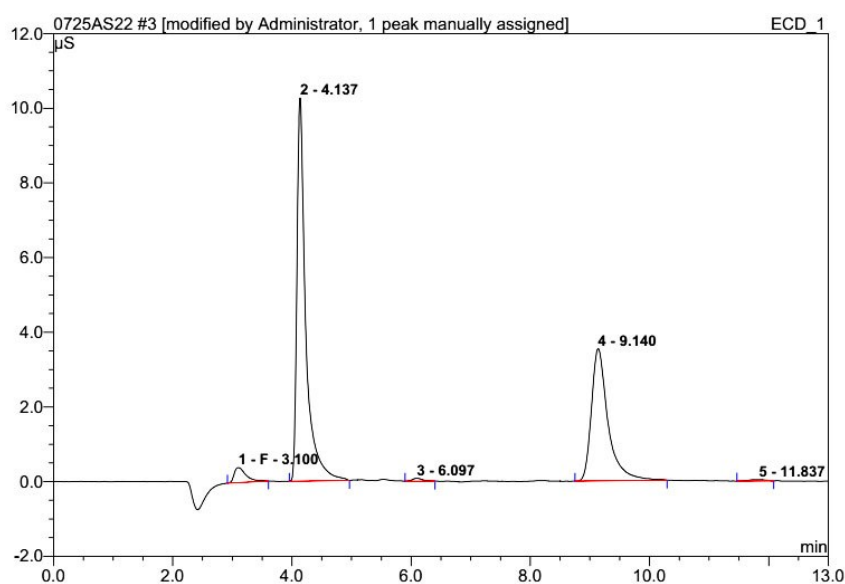

Fig. S21: Ion chromatogram of fluoride using an eluent containing  $\text{Na}_2\text{CO}_3$  (4.5 mM) +  $\text{NaHCO}_3$  (1.4 mM), a flow rate of  $1.20 \text{ mL min}^{-1}$ , injection volume of  $25 \text{ µL}$  and suppress current of 31 mA. The peaks highlighted are due to 1-F. Detailed Data shown in Table S2.

Table S2: The detailed data of Fig. S21.

| No.           | Ret.Time<br>min | Peak Name | Height<br>µS | Area<br>µS*min | Rel.Area<br>% | Amount<br>mg/L | Type  |
|---------------|-----------------|-----------|--------------|----------------|---------------|----------------|-------|
| 1             | 3.10            | F         | 0.399        | 0.092          | 3.07          | 0.400          | BMB*^ |
| 2             | 4.14            | n.a.      | 10.265       | 1.757          | 58.29         | n.a.           | BMB   |
| 3             | 6.10            | n.a.      | 0.077        | 0.015          | 0.51          | n.a.           | BMB   |
| 4             | 9.14            | n.a.      | 3.543        | 1.138          | 37.76         | n.a.           | BMB   |
| 5             | 11.84           | n.a.      | 0.034        | 0.011          | 0.37          | n.a.           | BMB   |
| <b>Total:</b> |                 |           | 14.317       | 3.014          | 100.00        | 0.400          |       |

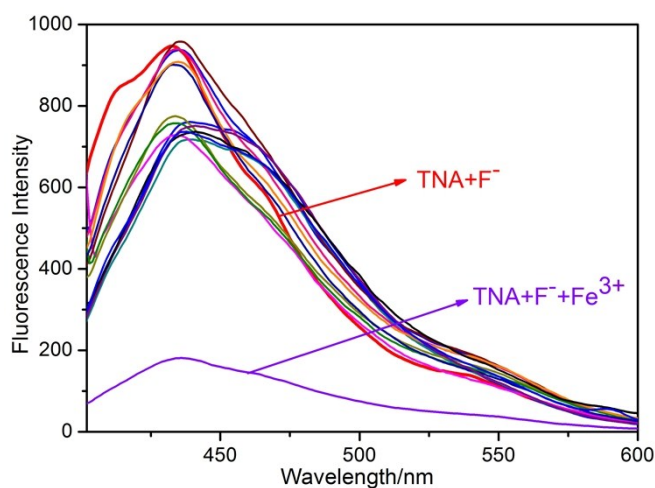

**Fig. S22:** Fluorescence emission spectra for **TNA-F** ( $1 \times 10^{-4}$  M) in DMSO/H<sub>2</sub>O (7.4 : 2.6, v/v) solution upon the addition of 10.0 equiv. of Ca<sup>2+</sup>, Mg<sup>2+</sup>, Pb<sup>2+</sup>, Ni<sup>2+</sup>, Co<sup>2+</sup>, Hg<sup>2+</sup>, Zn<sup>2+</sup>, Cd<sup>2+</sup>, Fe<sup>3+</sup>, Ag<sup>+</sup>, Cu<sup>2+</sup>, Cr<sup>3+</sup>, Al<sup>3+</sup>, Tb<sup>3+</sup>, Ba<sup>2+</sup>, La<sup>3+</sup> and Eu<sup>3+</sup>, respectively, ( $\lambda_{\text{ex}} = 380$  nm,  $\lambda_{\text{em}} = 430$  nm).

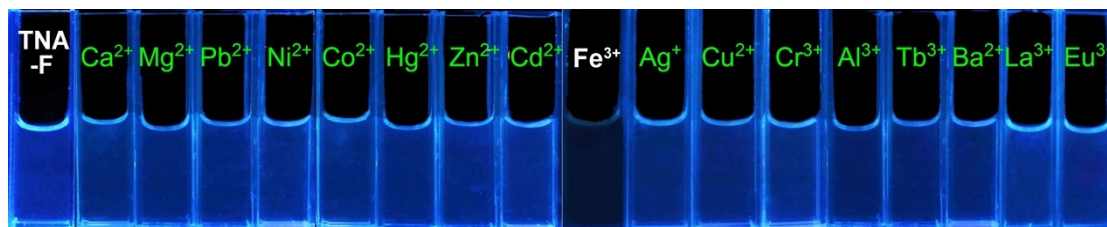

**Fig. S23:** Colour changes observed for **TNA-F** in DMSO/H<sub>2</sub>O (7.4 : 2.6, v/v) solution upon the addition of 10.0 equiv. of Ca<sup>2+</sup>, Mg<sup>2+</sup>, Pb<sup>2+</sup>, Ni<sup>2+</sup>, Co<sup>2+</sup>, Hg<sup>2+</sup>, Zn<sup>2+</sup>, Cd<sup>2+</sup>, Fe<sup>3+</sup>, Ag<sup>+</sup>, Cu<sup>2+</sup>, Cr<sup>3+</sup>, Al<sup>3+</sup>, Tb<sup>3+</sup>, Ba<sup>2+</sup>, La<sup>3+</sup> and Eu<sup>3+</sup>, respectively, under irradiation at 365 nm by a UV lamp.

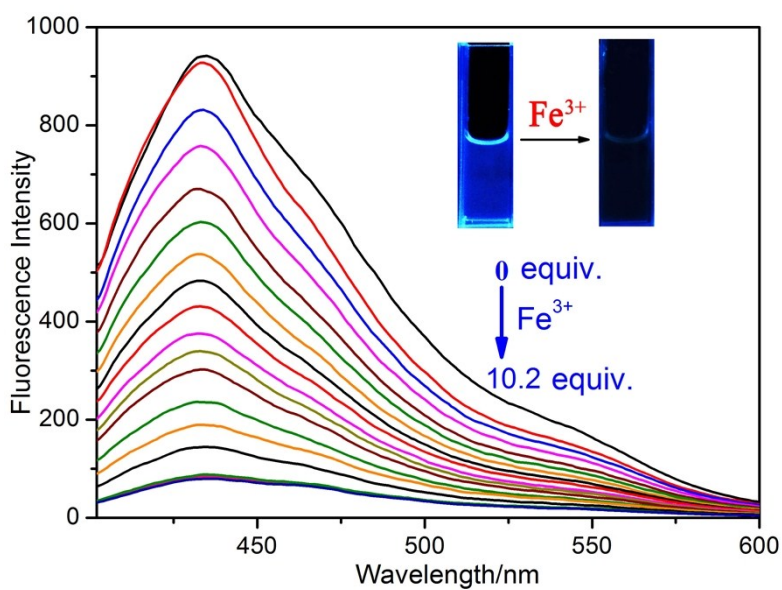

**Fig. S24:** Fluorescence spectra of **TNA-F** ( $1 \times 10^{-4}$  M) in the presence of different concentrations of Fe<sup>3+</sup> in DMSO/H<sub>2</sub>O (7.4 : 2.6, v/v) solution ( $\lambda_{\text{ex}} = 380$  nm,  $\lambda_{\text{em}} = 430$  nm).

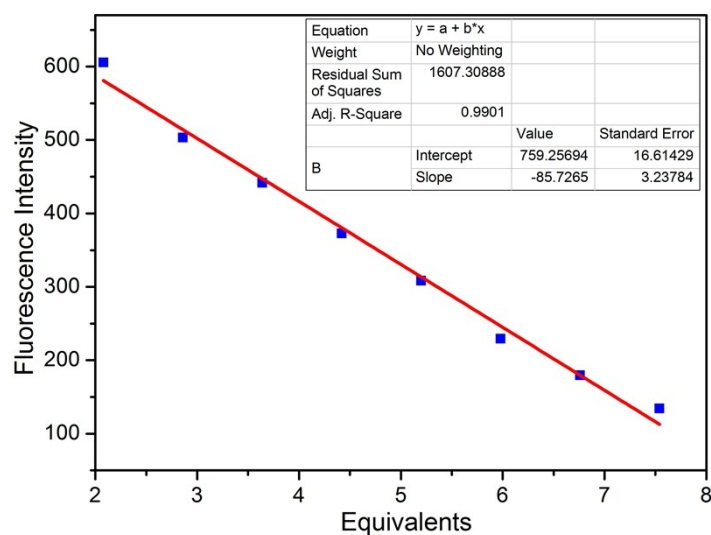

**Fig. S25:** Fluorescent spectrum linear range for  $\text{Fe}^{3+}$  by addition of various concentrations of  $\text{Fe}^{3+}$  to **TNA-F** ( $1 \times 10^{-4}$  M).

$$\text{Linear Equation: } Y = -85.7265X + 759.25694$$

$$R^2 = 0.9901$$

$$S = 85.7265 \times 10^6$$

$$\delta = \sqrt{\frac{\sum (x_i - \bar{x})^2}{n-1}} = 2.73 \quad (n = 20)$$

$$K = 3$$

$$\text{LOD} = K \times \frac{\delta}{\bar{S}} = 9.55 \times 10^{-8} \text{ M}$$

**Table S3:** Stability constants of iron and fluoride complexes in different proportions.<sup>S2 ~ S3</sup>

| Ions             | $\text{KS}_1$ | $\text{KS}_2$ | $\text{KS}_3$ | $\text{KS}_4$ | $\text{KS}_5$ | $\text{KS}_6$ |
|------------------|---------------|---------------|---------------|---------------|---------------|---------------|
| $\text{Fe}^{3+}$ | $10^{5.28}$   | $10^{9.30}$   | $10^{12.06}$  | /             | $10^{15.77}$  | $10^{16}$     |

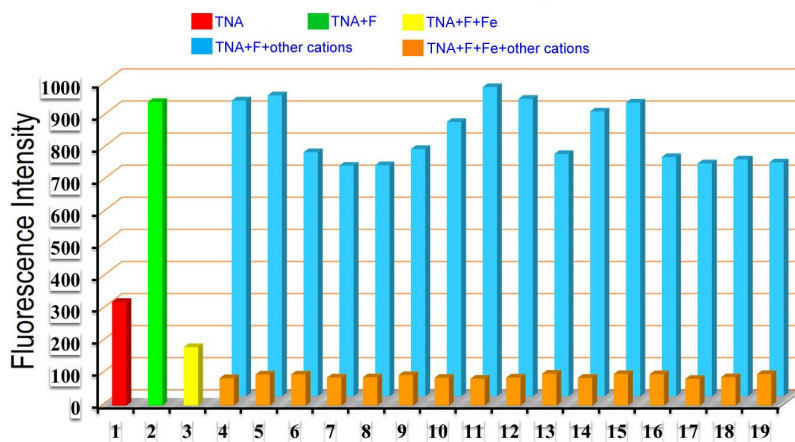

**Fig. S26:** Fluorescence of the sensor **TNA-F** at 380 nm with addition of 10.0 equiv. of  $\text{Fe}^{3+}$  in the presence of 10.0 equiv. of other cations in DMSO/ $\text{H}_2\text{O}$  (7.4 : 2.6, v/v) solution. (4.  $\text{Ca}^{2+}$ , 5.  $\text{Mg}^{2+}$ , 6.  $\text{Pb}^{2+}$ , 7.  $\text{Ni}^{2+}$ , 8.  $\text{Co}^{2+}$ , 9.  $\text{Hg}^{2+}$ , 10.  $\text{Zn}^{2+}$ , 11.  $\text{Cd}^{2+}$ , 12.  $\text{Ag}^+$ , 13.  $\text{Cu}^{2+}$ , 14.  $\text{Cr}^{3+}$ , 15.  $\text{Al}^{3+}$ , 16.  $\text{Tb}^{3+}$ , 17.  $\text{Ba}^{2+}$ , 18.  $\text{La}^{3+}$ , 19.  $\text{Eu}^{3+}$ ).

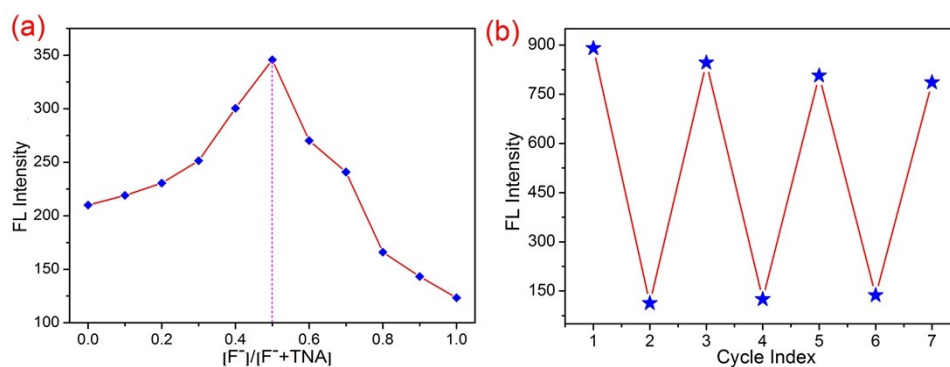

**Fig. S27:** (a) A Job's plot for the **TNA** and  $F^-$ , indicating the 1 : 1 stoichiometry for **TNA-F**. (b) Fluorescent “on-off-on” cycles of **TNA-F**, controlled by the alternate addition of  $Fe^{3+}$  and  $F^-$ .

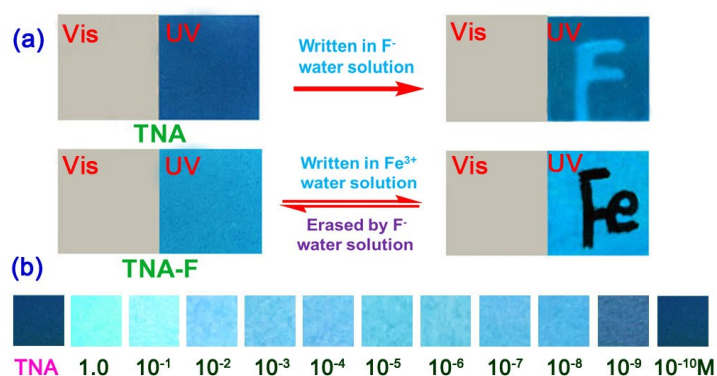

**Fig. S28:** (a) Photos of the silica gel plates loaded with **TNA** or **TNA-F** were utilized to sense  $F^-$  and  $Fe^{3+}$  in aqueous solutions under UV lamp at 365 nm; (b) Fluorescence colour changes (under the UV lamp, at  $\lambda_{ex} = 365$  nm) of **TNA**-based test kit after addition of different concentration  $F^-$  aqueous solutions (from 0 M to  $1 \times 10^{-9}$  M).

## Notes and references

- S1: (a) C. Chen, S. Q. Shen, L. L. Dong, J. J. Zhang, Q. Yang. *Bioorganic & Medicinal Chemistry*, 2018, **26**, 394–400.  
 (b) P. Raj, A. Singh, A. Singh, N. Singh. *Dalton Trans.*, 2017, **46**, 985-994.
- S2: Wuhan University Edit, *Analytical Chemistry*, Publ. 3, Higher Education Press, Beijing, 1995, pp. 526.
- S3: Beijing Normal University Edit, *Inorganic Chemistry Experiment*, Publ. 2, Higher Education Press, Beijing, 1991, pp.270.
